# Supplementary material for: Tetrabromobisphenol A (TBBPA) exhibits specific antimicrobial activity against Gram-positive bacteria without detectable resistance
Source: Royal Society of Chemistry journal article supplement (doi:10.1039/c7cc00613f), 2017-01-01
Supplement: c7cc00613f1.pdf [file c7cc00613f1.pdf]

1 Support Information for Tetrabromobisphenol A (TBBPA) Exhibits  
2 Specific Antimicrobial Activity against Gram-positive Bacteria without  
3 Detectable Resistance

4 Fang Ji<sup>a#</sup>, Chang Wang<sup>b#</sup>, Huimin Wang<sup>b#</sup>, Guangliang Liu<sup>b</sup>, Bolei Chen<sup>c</sup>, Ligang Hu<sup>d</sup>, Guibin  
5 Jiang<sup>d</sup>, Maoyong Song<sup>d</sup>, Yong Liang<sup>a,b,e\*</sup>

6 <sup>a</sup>School of Medicine, Jiangnan University, Wuhan 430056, P. R. China

7 <sup>b</sup>Institute of Environment and Health, Jiangnan University, Wuhan 430056, P. R. China

8 <sup>c</sup>Institute for Interdisciplinary Research, Jiangnan University, Wuhan 430056, P. R. China

9 <sup>d</sup>State Key Laboratory of Environmental Chemistry and Ecotoxicology, Research Center for Eco-  
10 Environmental Sciences, Chinese Academy of Sciences, P.O. Box 2871, Beijing 100085, P. R.  
11 China.

12 <sup>e</sup>Key Laboratory of Optoelectronic Chemical Materials and Devices (Jiangnan University),  
13 Ministry of Education, Wuhan 430056, P. R. China.

14 <sup>#</sup>Equal contribution.

15

16

17 \*Corresponding author:

18 Yong Liang

19 Institute of Environment and Health

20 Jiangnan University

21 Wuhan 430056, P. R. China

22 Tel: +86 27 84238886

23 E-mail: ly76@263.net

24

25

26

27

28

29

30

31

32

33

34 **Methods:**

35 **Materials:** Bacterial strains used in this study are listed in Table 1. The strains were obtained from  
36 State Key Laboratory of Agricultural Microbiology, Huazhong Agriculture University and the  
37 State Key Laboratory of Crop Biology, Shandong Agricultural University. The strains were  
38 cultured under normal conditions described previously<sup>[1]</sup>. The chemicals used in this study are as  
39 follows: TBBPA, 2,2-bis-(4-hydroxyphenyl) propane (BPA) and triclosan were obtained from  
40 Alfa Aesar Company; 2,2-bis-(3,5-dichloro-4-hydroxyphenyl)propane (TCBPA) from Tokyo  
41 Chemical Industry; 2,2',6,6'-tetrabromobisphenol A diallyl ether (TBBPADE) and 4,4'-  
42 isopropylidenebis [2-(2,6-dibromophenoxy) ethanol] (TBBPABE) from Sigma-Aldrich; 2,2-bis-  
43 (3,5-dibromo-4-hydroxyphenyl)sulfone (TBBPS) from Beijing Apis Biotechnology; Stock  
44 solutions of 10 mg/ml of these chemicals were prepared in dimethyl sulfoxide (DMSO). The  
45 antibiotics used in this paper are ampicillin and tetracycline that were purchased from  
46 Biosharp Company.

47 **Susceptibility test.** The minimum inhibitory concentrations (MICs) were determined with the  
48 broth microdilution method according to Clinical and Laboratory Standards Institute guidelines.  
49 The organisms in the exponential growth phase were diluted to a final inoculum of  $1 \times 10^5$  to  $5 \times$   
50  $10^5$  CFU/ml. The MIC was defined as the lowest concentration of a compound that completely  
51 inhibited bacterial growth<sup>[2]</sup>. Compounds were taken from a stock solution of 20 mg/ml in 100%  
52 dimethyl sulfoxide (DMSO).

53 **Preparation of bacterial samples for SEM and TEM.** When the OD<sub>600</sub> of the culture of *B.*  
54 *subtilis* reached approximately 0.6-0.8, TBBPA was added to a final concentration of  $1 \times \text{MIC}$  to  
55 the case, or equal amount of DMSO was added to the control. One hour later the cultures were  
56 centrifuged and prepared for scanning electron microscopy (SEM) and transmission electron

57 microscopy (TEM). SEM and TEM was performed following the method described by Wang *et*  
58 *al*<sup>[1]</sup> and Zhu *et al*<sup>[3]</sup>, respectively.

59 **Microarray and data analysis.** When the OD<sub>600</sub> of *B. subtilis* culture reached approximately 0.6-  
60 0.8, the cultures were challenged with 16 µg/ml of TBBPA or equal amount of DMSO (control).  
61 The cells were harvested 1 hour later and cell pellets were directly snap-frozen in dry ice. We then  
62 submitted the samples to KangChen Biotech (Shanghai, China) for an mRNA microarray assay.  
63 Sample processing including labelling, hybridization, scanning, and normalization, and data  
64 analysis was performed by KangChen Biotech (Supplementary file 2).

65 **RNA isolation and reverse transcription.** *B. subtilis* cells were grown till the OD<sub>600</sub> reached  
66 approximately 0.6-0.8. Each compound (TBBPA, TCBPA, BPA, TBBPADE, TBBPABE and  
67 TBBPS) at different concentrations or DMSO (control) were added respectively. The cells were  
68 harvested 1 hour later and the RNA was isolated according to the Bacterial RNA Kit (Omega Bio-  
69 tek) then was reverse transcribed with M-MLV reverse transcriptase (High Capacity cDNA  
70 Reverse Transcription kit; Promega, UK Ltd.)

71 **Quantitative reverse transcription-polymerase chain reaction (qRT-PCR).** The reaction was  
72 performed on cDNA generated from RNA samples (each experiment was performed at least three  
73 times). Three genes of *dlt* operon identified by microarray analysis as up-regulated by TBBPA,  
74 *dltA* was chosen to be tested by qRT-PCR with *rpsJ* gene as the internal control. The used primers  
75 were listed in Table S1. qRT-PCR was run using the SYBR Green Realtime PCR Master Mix  
76 (TOYOBO CO., LTD.) according to the manufacturer's procedure. The amplification reaction  
77 was carried out using the following program: 95°C for 10 min, 55 cycles of (95°C for 30 s, 57°C  
78 for 30 s), and 72°C for 30 s. Expression of the *dlt* and autolysin genes was calculated as fold

79 changes using the following formula: fold change =  $2^{-\Delta\Delta Ct}$

80  $-\Delta\Delta Ct = (Ct_{\text{gene x}} - Ct_{\text{tpsJ}})_{\text{condition I}} - (Ct_{\text{gene x}} - Ct_{\text{tpsJ}})_{\text{condition II}}$  ([4]).

## 81 **Background information on cell wall synthesis and degradation in Gram-positive bacteria.**

82 A significant difference between Gram-positive and Gram-negative bacteria is the presence of  
83 teichoic acids (TAs) specifically in Gram-positive bacteria cell wall. The TAs are closely related  
84 to the synthesis and degradation of cell wall, which is regulated by the *dlt* operon and autolysins.  
85 The *dlt* operon is responsible for adding positively charged D-alanine *via* esterification to teichoic  
86 acids (TAs), as DltA ligates D-alanines in the cytoplasm of the cell and the ligated form is then  
87 transported by the carrier protein DltC<sup>[5]</sup>. The TAs, including wall teichoic acid (WTA) and  
88 lipoteichoic acid (LTA), are a major structural component specifically present in the gram-positive  
89 cell wall. WTA is covalently linked to the peptidoglycan, while LTA is amphiphilic with its  
90 glycolipid being anchored in the membrane and its poly-glycerophosphate (Gro-P) chain  
91 extending into the wall. Together with peptidoglycan, WTA and LTA construct the network or  
92 matrix that provides functions relating to the elasticity, porosity, tensile strength, and electrostatic  
93 steering of the cell wall envelope<sup>[6]</sup>. Protonated D-alanyl ester residues, one of the principal  
94 substituents of TAs in many low-G+C gram-positive bacteria, are covalently linked to these  
95 chains and provide counter ions for determining the net negative charge of the TA. The bacterial  
96 cell wall is a dynamic structure that undergoes coordinated synthesis and degradation during cell  
97 growth and division. The degradative phase, referred to as “autolysis”, is mediated by autolysins  
98 <sup>[7]</sup>. Negatively charged D-alanyl-TAs provide binding sites for cationic autolysins by electrostatic  
99 interaction, therefore, D-alanyl-TAs play an important role in modulating the activities of  
100 autolysins by means of changing the amount of binding sites<sup>[8]</sup>.

101 Table S1. Oligonucleotide primers used for qRT-PCR analysis.

| Primer target <sup>a</sup> |   | Sequence(5' to 3') <sup>b</sup> |
|----------------------------|---|---------------------------------|
| <i>dltA</i>                | F | GGGACTTTACATTGCGTGAC            |
|                            | R | CACAAAGGAAGGTGTTGATG            |
| <i>rpsJ</i>                | F | CGGTTACGAAGCAATCCAG             |
|                            | R | ATACGCATCCATTTCCACT             |
| <i>yocH</i>                | F | AAATAAGAACCCGAACGCGA            |
|                            | R | GCCCCAATTAGAAGCATCAC            |
| <i>cwlO</i>                | F | CAATCTGAGGTTGCTTCCCA            |
|                            | R | TCGCACGAGAGATAAAGTCA            |

102 <sup>a</sup>Based on the annotation of *B. subtilis* 168 genome.

103 *dltA*: D-alanine--poly(phosphoribitol) ligase subunit 1      *rpsJ*: 30S ribosomal protein S10

104 *yocH*: cell wall-binding protein      *cwlO*: peptidoglycan D,L-endopeptidase

105 <sup>b</sup>Forward (F) and reverse (R) primers.

106

107

108

109

110

111

112

113

114

115

116

117

118

119

120

121

122

123

124

125

126

127

128

129

130

131

132

133

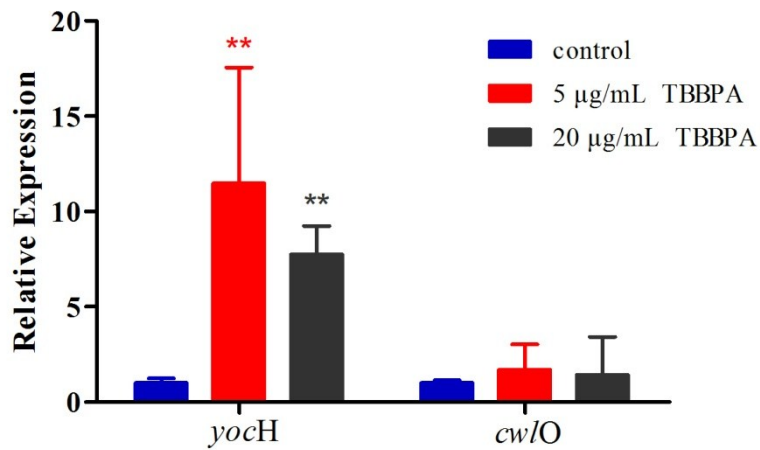

Figure. S1. Effects of TBBPA on *yocH* and *cwI/O* mRNA. Bs168 was grown to an OD<sub>600</sub> of 0.6-0.8 and incubated for 90 min with the addition of different concentrations of TBBPA. Mean values from three different experiments are shown. The error bars indicate  $\pm$ standard deviations. The results shown are representative of experiments performed at least three times.

178  
179  
180  
181  
182  
183  
184  
185  
186  
187  
188  
189  
190  
191  
192  
193  
194  
195  
196  
197  
198  
199  
200  
201  
202  
203  
204  
205  
206  
207  
208  
209  
210  
211  
212  
213  
214  
215  
216  
217  
218  
219  
220  
221

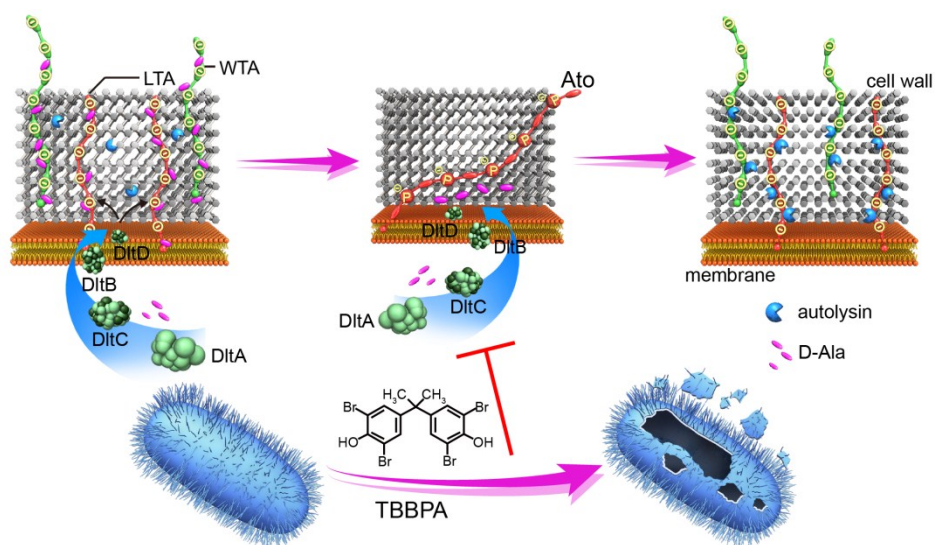

Figure. S2: The schematic diagram of the proposed processes involved in cell wall damage caused by TBBPA. ATO:Alditol; LTA:lipid teichoic acid; WTA: wall teichoic acid

## 222 References

- 223 [1] C. Wang, L. Wang, Y. Wang, Y. Liang, J. Zhang, *Environmental Earth Sciences* 2012, 1-7.
- 224 [2] T. M. Menzel, M. Tischer, P. Francois, J. Nickel, J. Schrenzel, H. Bruhn, A. Albrecht, L. Lehmann, U.
- 225 Holzgrabe, K. Ohlsen, *Antimicrob Agents Chemother* 2011, 55, 311-320.
- 226 [3] Y. Zhu, F. Ji, H. Shang, Q. Zhu, P. Wang, C. Xu, Y. Deng, D. Peng, L. Ruan, M. Sun, *PloS one* 2011, 6,
- 227 e27164.
- 228 [4] T. Wecke, B. Veith, A. Ehrenreich, T. Mascher, *Journal of bacteriology* 2006, 188, 7500-7511.
- 229 [5] N. T. Reichmann, C. P. Cassona, A. Grundling, *Microbiology* **2013**, 159, 1868-1877.
- 230 [6] H. Yonus, P. Neumann, S. Zimmermann, J. J. May, M. A. Marahiel, M. T. Stubbs, *J. Bio. Chem* **2008**, 283,
- 231 32484-32491.
- 232 [7] S. P. Falk, J. W. Noah, B. Weisblum, *Antimicrob. Agents. Chemother* **2010**, 54, 3723-3729.
- 233 [8] a) F. C. Neuhaus, J. Baddiley, *Microb. Mol. Bio. Rev* **2003**, 67, 686-723; b) A. Steen, E. Palumbo, M.
- 234 Deghorain, P. S. Cocconcelli, J. Delcour, O. P. Kuipers, J. Kok, G. Buist, P. Hols, *J. Bacteriol* **2005**, 187, 114-124;
- 235 c) J. Wecke, M. Perego, W. Fischer, *Microb. Drug. Resist* **1996**, 2, 123-129

236

237

238
